# Supplementary material
Source: PubMed Central journal article supplement (PMC549435)

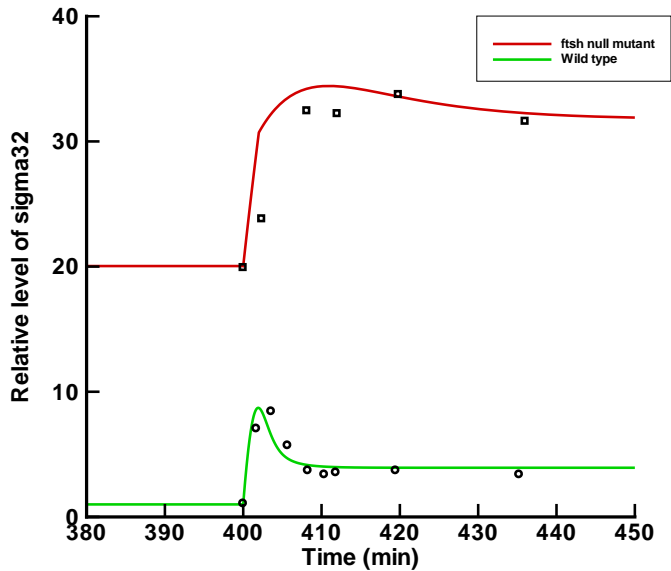

Supplement: pnas_102_8_2736__2.pdf [file pnas_102_8_2736__2.pdf]

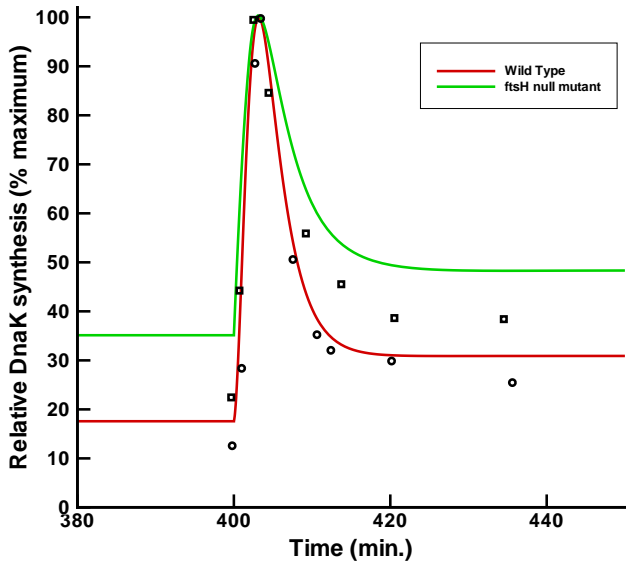

Supplement: pnas_102_8_2736__3.pdf [file pnas_102_8_2736__3.pdf]

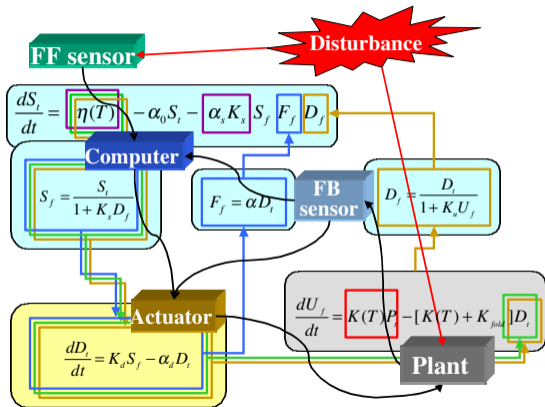

Supplement: pnas_102_8_2736__4.pdf [file pnas_102_8_2736__4.pdf]
